# Supplementary material for: Innovative FOCUS: A Program to Foster Creativity and Innovation in the Context of Education for Sustainability
Source: MDPI journal article supplement (doi:10.3390/su16062257), 2024-03-08
Supplement: s1 [file s1]

Archive with 1 entries (1 files):
- sustainability-2877303-supplementary.pdf
